# Supplementary material for: Hippocampal CA3 activation alleviates fMRI-BOLD responses in the rat prefrontal cortex induced by electrical VTA stimulation
Source: PLoS One. 2017 Feb 27;12(2):e0172926. doi: 10.1371/journal.pone.0172926 (PMC5328285; doi:10.1371/journal.pone.0172926)
Supplement: S1 Table — (see also Fig 2, S1 Fig). (DOCX) [file pone.0172926.s005.docx]

|  |  |  |  |  |  |  |  |  |  |  |
| --- | --- | --- | --- | --- | --- | --- | --- | --- | --- | --- |
| | **1 CA3** | le-HC | ri HC | mPFC | ri NAcc | septum | VTA | le stria | ri stria | le NAcc | | --- | --- | --- | --- | --- | --- | --- | --- | --- | --- | | le-HC | 1 |  |  |  |  |  |  |  |  | | ri HC | **0.9323** | 1 |  |  |  |  |  |  |  | | mPFC | -0.2776 | -0.1669 | 1 |  |  |  |  |  |  | | ri NAcc | 0.0801 | 0.0594 | 0.0782 | 1 |  |  |  |  |  | | septum | **0.8252** | **0.8187** | -0.1475 | 0.0381 | 1 |  |  |  |  | | VTA | 0.0133 | 0.0267 | -0.0976 | 0.0118 | 0.0716 | 1 |  |  |  | | le stria | -0.1599 | -0.2082 | 0.0717 | 0.1496 | -0.0570 | -0.0379 | 1 |  |  | | ri stria | -0.2102 | -0.2381 | 0.0247 | 0.0928 | -0.0835 | -0.0335 | **0.4825** | 1 |  | | le NAcc | -0.0564 | -0.0131 | 0.2544 | 0.1913 | 0.0272 | 0.2313 | 0.1941 | 0.1639 | 1 | |  |  |  |  |  |  |  |  |  |  | |  |  |  |  |  |  |  |  |  |  | | **2 VTA** | le-HC | ri HC | mPFC | ri NAcc | septum | VTA | le stria | ri stria | le NAcc | | le-HC | 1 |  |  |  |  |  |  |  |  | | ri HC | 0.3738 | 1 |  |  |  |  |  |  |  | | mPFC | **0.4457** | 0.7110 | 1 |  |  |  |  |  |  | | ri NAcc | **0.4871** | 0.2902 | 0.3803 | 1 |  |  |  |  |  | | septum | **0.5512** | **0.6975** | **0.8637** | 0.3727 | 1 |  |  |  |  | | VTA | **0.6092** | **0.6187** | **0.6369** | 0.3762 | **0.7706** | 1 |  |  |  | | le stria | -0.1797 | -0.2438 | **-0.5318** | 0.0693 | **-0.4879** | -0.1970 | 1 |  |  | | ri stria | -0.1816 | -0.2661 | -0.3694 | 0.1213 | -0.3760 | -0.1471 | **0.7976** | 1 |  | | le NAcc | 0.3212 | 0.2910 | 0.3304 | **0.4138** | 0.2955 | 0.3960 | 0.3444 | 0.3317 | 1 | |  |  |  |  |  |  |  |  |  |  | |  |  |  |  |  |  |  |  |  |  | | **3 CA3+VTA** | le-HC | ri HC | mPFC | ri NAcc | septum | VTA | le stria | ri stria | le NAcc | | le-HC | 1 |  |  |  |  |  |  |  |  | | ri HC | **0.8273** | 1 |  |  |  |  |  |  |  | | mPFC | -0.0103 | 0.3535 | 1 |  |  |  |  |  |  | | ri NAcc | 0.3879 | 0.3209 | 0.0198 | 1 |  |  |  |  |  | | septum | **0.7873** | **0.7915** | 0.1893 | 0.2464 | 1 |  |  |  |  | | VTA | **0.6242** | **0.6120** | 0.0998 | 0.2300 | **0.6621** | 1 |  |  |  | | le stria | **-0.4112** | **-0.4994** | -0.1282 | 0.0202 | **-0.5159** | -0.1423 | 1 |  |  | | ri stria | -0.1989 | -0.3591 | -0.1808 | 0.2448 | -0.3820 | -0.0987 | **0.6917** | 1 |  | | le NAcc | 0.0334 | 0.0746 | 0.1549 | 0.0521 | -0.0531 | 0.1028 | 0.2894 | 0.2097 | 1 | |  |  |  |  |  |  |  |  |  |  |
|  |  |  |  |  |  |  |  |  |  |  |
|  |  |  |  |  |  |  |  |  |  |  |
|  |  |  |  |  |  |  |  |  |  |  |
| **S1 Table.** **Pearson correlation coefficients calculated from BOLD time series of analyzed VOIs measured during experiment 1** (see also Fig 2, S1 Fig). |  |  |  |  |  |  |  |  |  |  |
|  |  |  |  |  |  |  |  |  |  |  |
